# Supplementary material for: Potential for Pancreatic Maturation of Differentiating Human Embryonic Stem Cells Is Sensitive to the Specific Pathway of Definitive Endoderm Commitment
Source: PLoS One. 2014 Apr 17;9(4):e94307. doi: 10.1371/journal.pone.0094307 (PMC3990550; doi:10.1371/journal.pone.0094307)
Supplement: Table S2 — Primers for quantitative RT-PCR. (DOCX) [file pone.0094307.s006.docx]

**Primers for qPCR**

| **Gene** | **Primers** | **Reference** |
| --- | --- | --- |
| GAPDH | ACGACCACTTTGTCAAGCTCATTTC | D'Amour et al., 2006 |
| GCAGTGAGGGTCTCTCTCTTCCTCT |
| SOX17 | CTCTGCCTCCTCCACGAA | Osafune et al., 2008 |
| CAGAATCCAGACCTGCACAA |
| CER | ACAGTGCCCTTCAGCCAGACT | D'Amour et al., 2006 |
| ACAACTACTTTTTCACAGCCTTCGT |
| FOXA2 (Hnf3b) | GGAGCGGTGAAGATGGAA | Osafune et al., 2008 |
| TACGTGTTCATGCCGTTCAT |
| CXCR4 | CACCGCATCTGGAGAACCA | D'Amour et al., 2006 |
| GCCCATTTCCTCGGTGTAGTT |
| PDX1 | AAGTCTACCAAAGCTCACGCG | Kroon et al., 2008 |
| GTAGGCGCCGCCTGC |
| PTF1 | GAAGGTCATCATCTGCCATCG | D'Amour et al., 2006 |
| GGCCATAATCAGGGTCGCT |
| NGN3 | CCTTACCCTTAGCACCA | Kroon et al., 2008 |
| CCCTCTACTCCCCAGTCTCC |
| HNF6 | TGTGGAAGTGGCTGCAGGA | Zhang et al., 2009 |
| TGTGAAGACCAACCTGGGCT |
| HLXB9 | CACCGCGGGCATGATC | D'Amour et al., 2006 |
| ACTTCCCCAGGAGGTTCGA |
| PAX4 | TCTCCTCCATCAACCGAGTC | Zhang et al., 2009 |
| GAGCCACTATGGGGAGTGAG |
| PAX6 | CGAATTCTGCAGGTGTCCAA | Zhang et al., 2009 |
| ACAGACCCCCTCGGACAGTAAT |
| NKX6-1 | AGACCCACTTTTTCCGGACA | Zhang et al., 2009 |
| CCAACGAATAGGCCAAACGA |
| NKX2-2 | GGCCTTCAGTACTCCCTGCA | D'Amour et al., 2006 |
| GGGACTTGGAGCTTGAGTCCT |
| ISL1 | GATCTATGTCACCTCGCAAGG | Osafune et al., 2008 |
| TACAACCACCATTTCACTG |
| MAFA | CTTCAGCAAGGAGGAGGTCATC | Zhang et al., 2009 |
| CTCGTATTTCTCCTTGTACAGGTCC |
| SOMATOSTATIN | CCCAGACTCCGTCAGTTTCT | Zhang et al., 2009 |
| ATCATTCTCCGTCTGGTTGG |
| GLUT2 | AGCTTTGCAGTTGGTGGAAT | Hui et al., 2001 |
| AATAAGAATGCCCGTGACGA |
| INSULIN | AAGAGGCCATCAAGCAGATCA | D'Amour et al., 2006 |
| CAGGAGGCGCATCCACA |
| GLUCAGON | AGGCAGACCCACTCAGTGA | Osafune et al., 2008 |
| AACAATGGCGACCTCTTCTG |
